# Supplementary material for: A Convergent Approach for a Deep Converting Lignin-First Biorefinery Rendering High-Energy-Density Drop-in Fuels
Source: PubMed Central journal article supplement — Joule. 2018 Jun 20;2(6):1118–33. doi: 10.1016/j.joule.2018.03.012 (PMC6015120; doi:10.1016/j.joule.2018.03.012), 2018-06-20
Supplement: mmc1.pdf [file mmc1.pdf]

**JOUL, Volume 2**

**Supplemental Information**

**A Convergent Approach for a Deep**

**Converting Lignin-First Biorefinery**

**Rendering High-Energy-Density Drop-in Fuels**

**Zhengwen Cao, Michael Dierks, Matthew Thomas Clough, Ilton Barros Daltro de Castro, and Roberto Rinaldi**

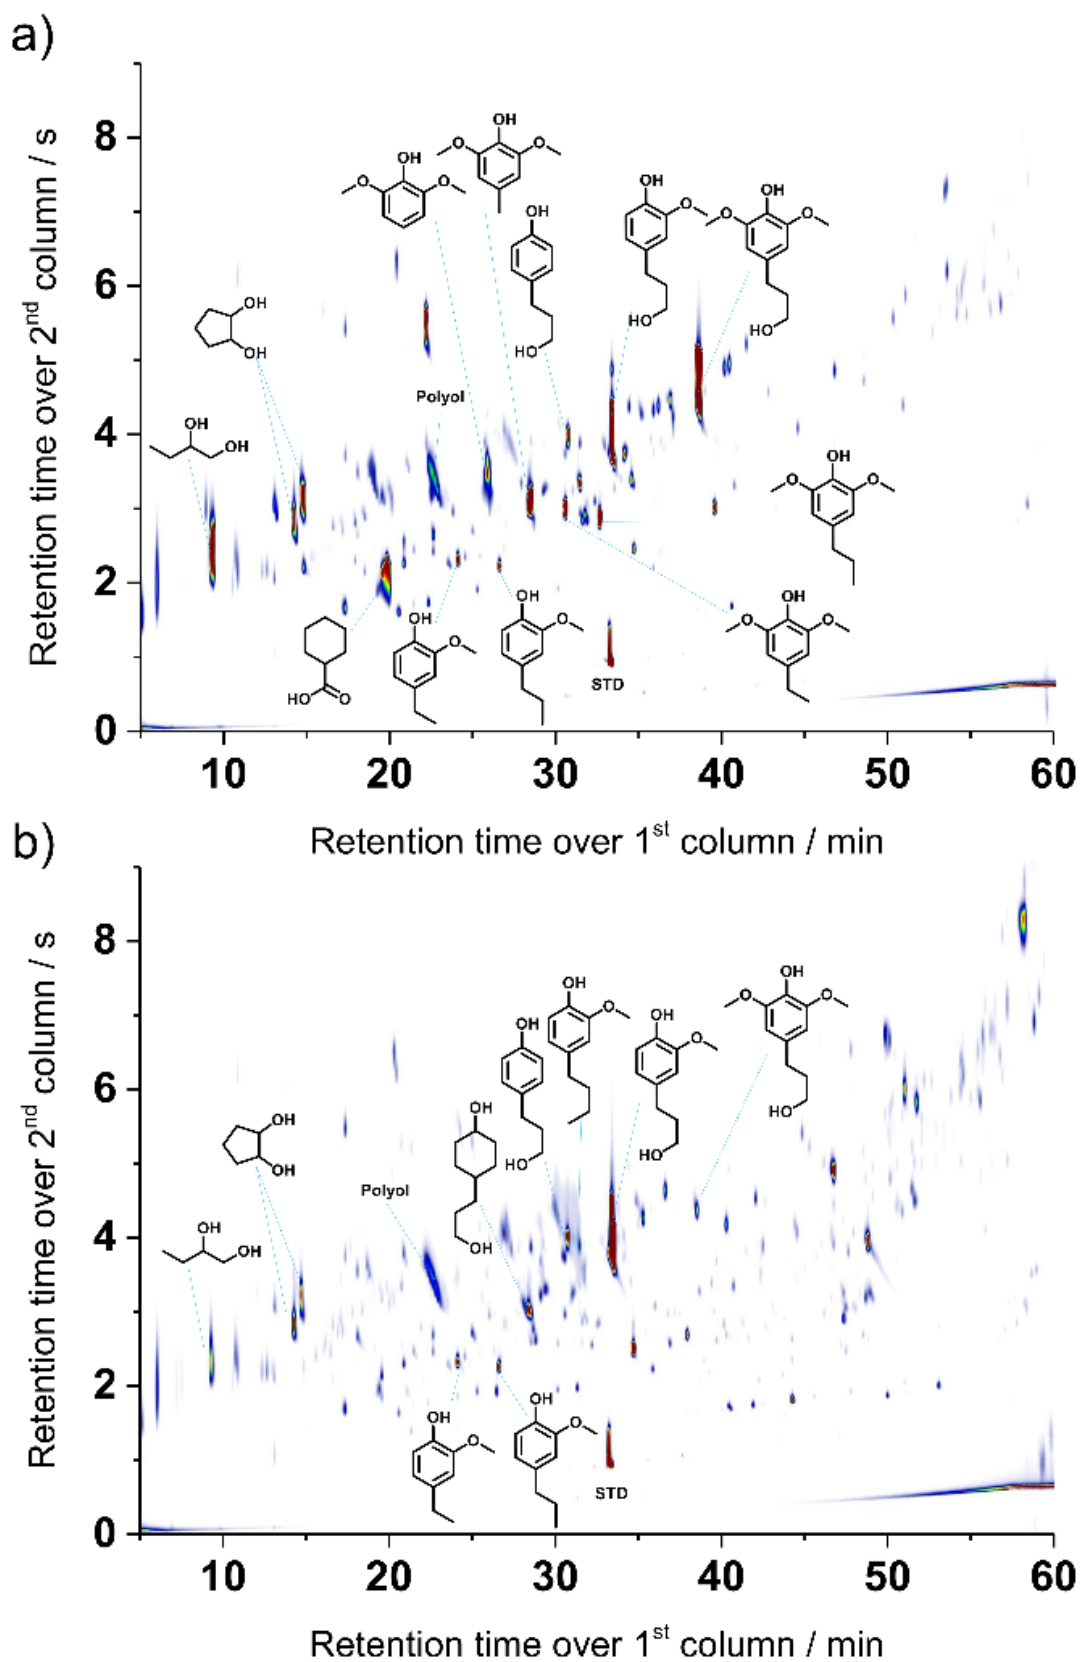

Figure S1. GCxGC-MS(FID) images showing volatile products of lignin oil from (a) Poplar and (b) Spruce.

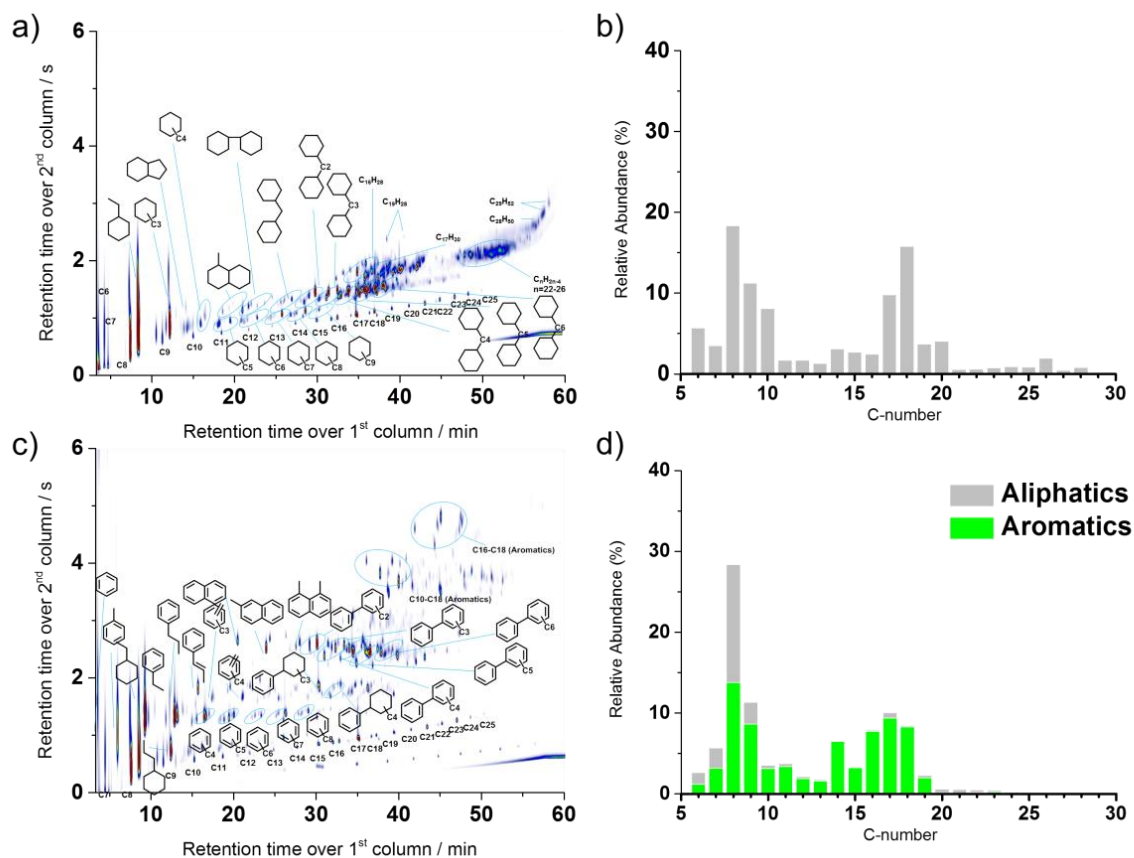

**Figure S2.** GCxGC-MS(FID) traces highlighting volatile products obtained from the HDO of Spruce (a, c). Distribution of products according to their C-atoms (b, d). high pressure / 5 MPa - low temperature / 573 K for aliphatics-directed HDO; (c, d): low pressure / 1 MPa - high temperature / 623 K for aromatics-directed HDO. The semi-quantification of the products was performed based on ECN method.<sup>1</sup>

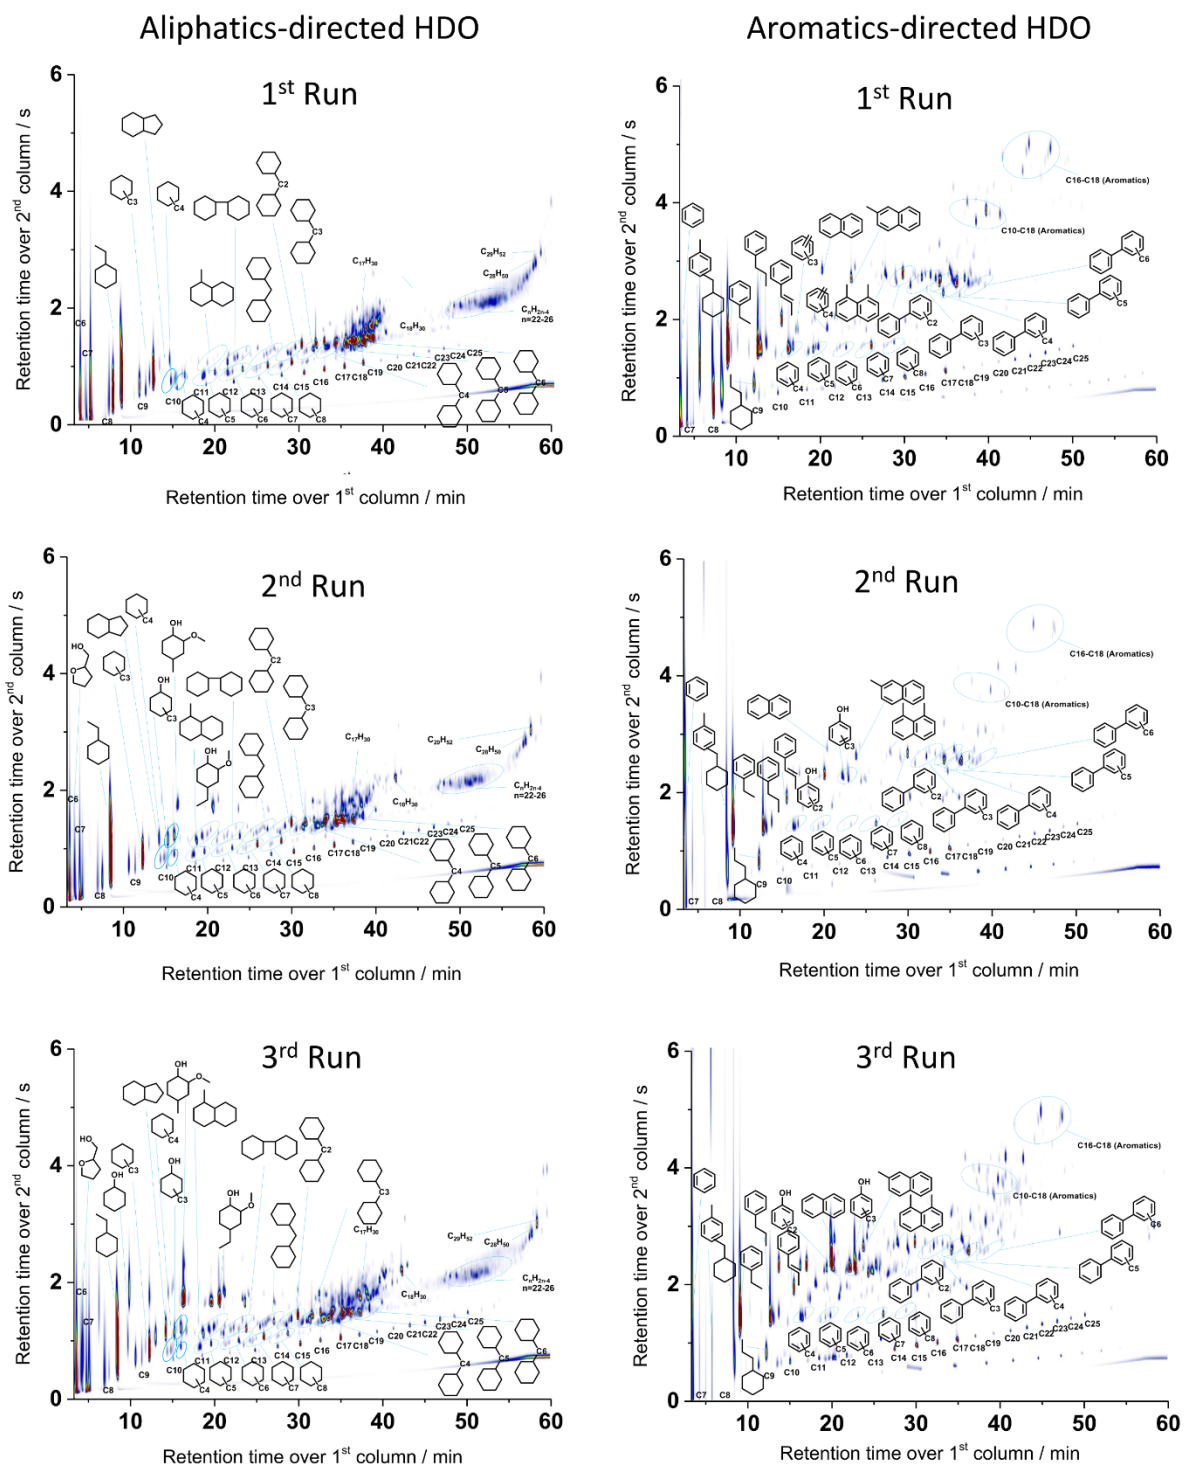

Figure S3. GCxGC-MS(FID) traces highlighting volatile products obtained from Poplar lignin oil in the recycling experiments under aliphatics-directed or aromatics-directed HDO condition.

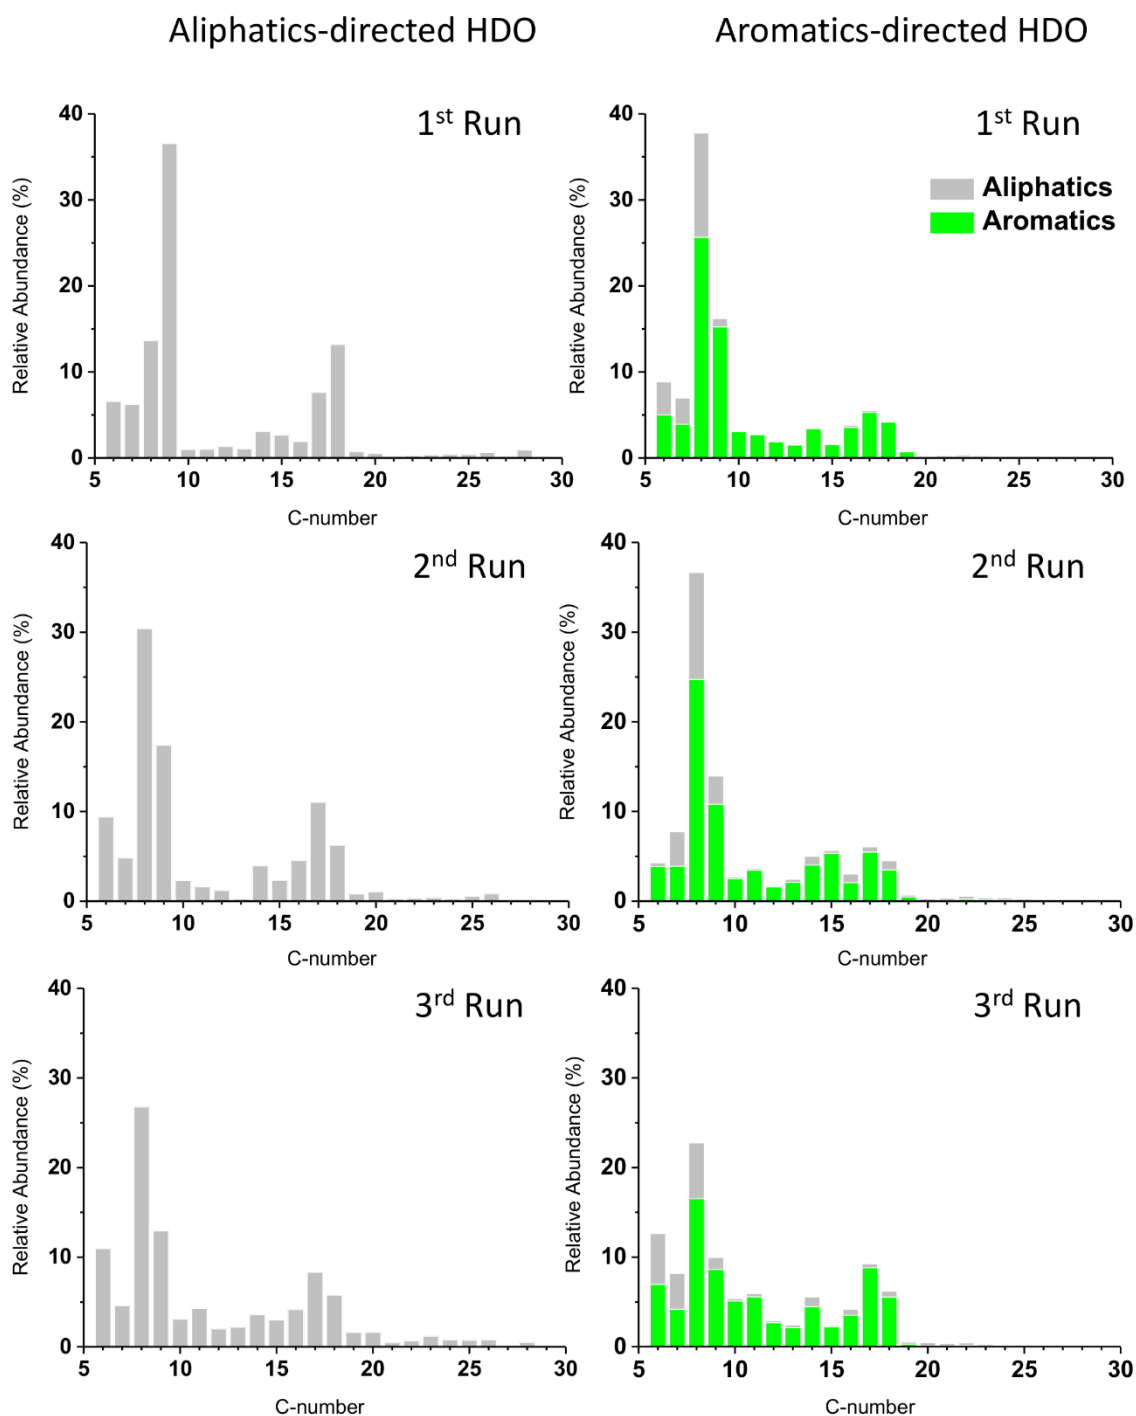

**Figure S4.** Product distribution in terms of C-number obtained from Poplar lignin oil in the recycling experiments under aliphatics-directed or aromatics-directed HDO condition. The semi-quantification of the products was performed based on ECN concept.<sup>1</sup>

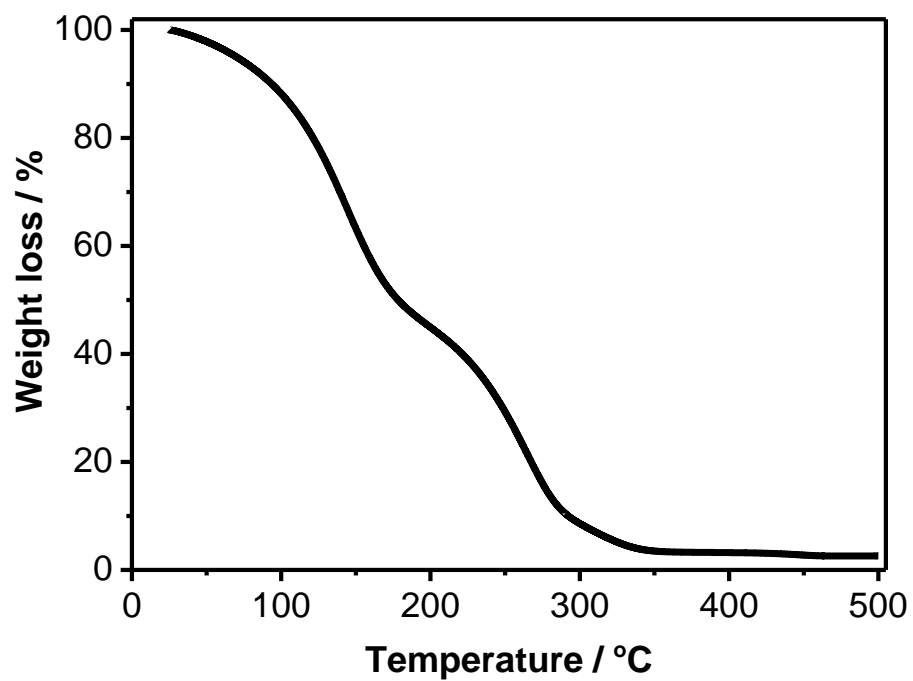

Figure S5. Temperature-ramped Thermogravimetric Analysis (TGA) traces products obtained from the HDO of Poplar.

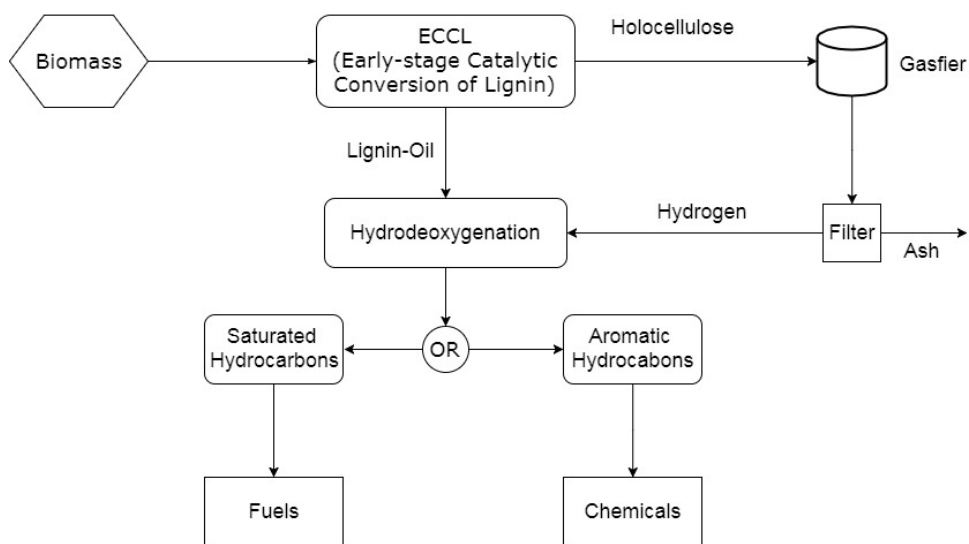

Figure S6. Block Flow Diagram for the proposed approach in this work

**Table S1.** Results of HDO of guaiacol in a two-run recycling experiment performed on the precursor Ni/SiO<sub>2</sub>. Reaction conditions: 50 mg Ni/SiO<sub>2</sub>, 5 mmol guaiacol, 9.5 ml *n*-octane, 568 K, 5 MPa H<sub>2</sub>, 1h.

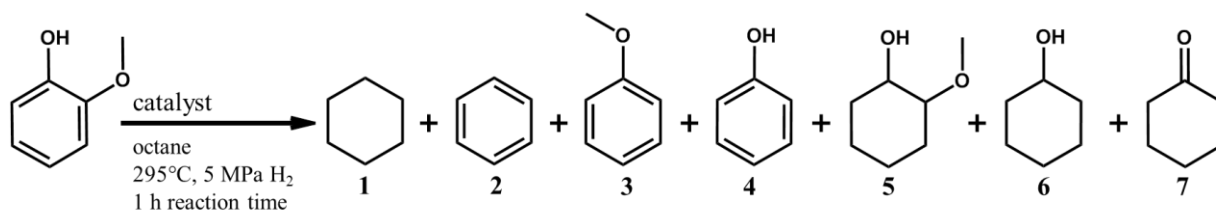

| Catalyst                      | Run | Conversion (%) | Selectivity (%) |    |    |    |   |   |   |
|-------------------------------|-----|----------------|-----------------|----|----|----|---|---|---|
|                               |     |                | 1               | 2  | 3  | 4  | 5 | 6 | 7 |
| Ni/SiO <sub>2</sub> precursor | 1   | 98             | 73              | 11 | 10 | 6  | 0 | 0 | 0 |
| Ni/SiO <sub>2</sub> precursor | 2   | 27             | 48              | 3  | 14 | 28 | 3 | 1 | 2 |



**Table S2.** Reported H<sub>2</sub>-productivity in the gasification of cellulose, glucose, xylan, cedar wood, pine wood, and sawdust.

| Entry | Feed       | Catalyst                                            | H <sub>2</sub> Productivity (H <sub>2</sub><br>mol/ feedstock kg) | Ref. |
|-------|------------|-----------------------------------------------------|-------------------------------------------------------------------|------|
| 1     | Cellulose  | Ni-Zn-Al                                            | 18.7                                                              | 2    |
| 2     | Cellulose  |                                                     | 11.5-14.0 (12.8) *                                                | 3    |
| 3     | Cellulose  | Ni/MCM-41                                           | 9.8-10.6 (10.2)                                                   | 4    |
| 4     | Cellulose  | Ni-based                                            | 5-11 (8.0)                                                        | 5    |
| 5     | Cellulose  | Ni/Zeolites                                         | 11.3-15.3 (13.3)                                                  | 6    |
| 6     | Cellulose  | Rh/CeO <sub>2</sub> /SiO                            | 9.4-37.6 (23.5)                                                   | 7    |
| 7     | Glucose    | Clostridium<br>thermocellum                         | ~4.5-12.8                                                         | 8    |
| 8     | Glucose    | Ni-based/Al <sub>2</sub> O <sub>3</sub>             | 5.6-15.6                                                          | 9    |
| 9     | Xylan      | Ni-Zn-Al                                            | 17.5                                                              | 2    |
| 10    | Xylan      |                                                     | 9.0-18.0 (13.5)                                                   | 3    |
| 11    | Cedar wood | Ni/CeO <sub>2</sub> /Al <sub>2</sub> O <sub>3</sub> | ~28.0-35.0                                                        | 10   |
| 12    | Pine       | Ni-based                                            | 70 (CO) †                                                         | 11   |
| 13    | Sawdust    | Ni/MCM-41                                           | ~6.2-18.2                                                         | 12   |

\*the mean average value in parentheses is taken; †additional carbon monoxide is applied.

**Table S3.** Chemical compositions, theoretical carbon and weight yields, and corresponding 'process thermal efficiency' (PTE) values for selected biomass feedstocks.<sup>13-15</sup> The HHV values are relative to the products of the aliphatics-directed HDO.

| Feedstock                     | Cellulose<br>/% | Hemicellulos<br>e /% | Lignin<br>/% | C- yield*<br>/% | Weight<br>yield /% | PTE<br>(HHV)/%† |
|-------------------------------|-----------------|----------------------|--------------|-----------------|--------------------|-----------------|
| Cellulose to<br>Ethanol (dry) |                 |                      |              | 9               | 9 <sup>16,17</sup> | 13              |
| <i>NEW STRATEGY</i>           |                 |                      |              |                 |                    |                 |
| Sugarcane bagasse             | 42              | 25                   | 20           | 21              | 13                 | 30              |
| Energy cane                   | 43              | 24                   | 22           | 23              | 15                 | 33              |
| Sweet sorghum                 | 45              | 27                   | 21           | 22              | 14                 | 32              |
| Hardwood                      |                 |                      |              |                 |                    |                 |
| Yellow-poplar                 | 45              | 19                   | 20           | 21              | 13                 | 30              |
| White poplar                  | 52              | 23                   | 16           | 17              | 11                 | 24              |
| White ash                     | 41              | 15                   | 26           | 28              | 17                 | 39              |
| Sand hickory                  | 50              | 17                   | 23           | 24              | 15                 | 35              |
| Boxelder                      | 45              | 20                   | 30           | 32              | 20                 | 45              |
| Scarlet oak                   | 46              | 18                   | 28           | 30              | 19                 | 42              |
| Northern red oak              | 46              | 22                   | 24           | 25              | 16                 | 36              |
| River birch                   | 41              | 23                   | 21           | 22              | 14                 | 32              |
| Pacific madrone               | 44              | 23                   | 21           | 22              | 14                 | 32              |
| Shagbark hickory              | 48              | 18                   | 21           | 22              | 14                 | 32              |
| Softwood                      |                 |                      |              |                 |                    |                 |
| Pacific silver fir            | 44              | 10                   | 29           | 31              | 19                 | 44              |
| White fir                     | 49              | 6                    | 28           | 30              | 19                 | 42              |
| Alligator juniper             | 40              | 5                    | 34           | 36              | 23                 | 51              |
| Western larch                 | 48              | 9                    | 27           | 29              | 18                 | 41              |
| Sitka spruce                  | 45              | 7                    | 27           | 29              | 18                 | 41              |

**Table S3. Cont.**

| Feedstock               | Cellulose<br>/% | Hemicellulos<br>e /% | Lignin<br>/% | C- yield*<br>/% | Weight<br>yield /% | PTE<br>(HHV)/%† |
|-------------------------|-----------------|----------------------|--------------|-----------------|--------------------|-----------------|
| Sand pine               | 44              | 11                   | 27           | 29              | 18                 | 41              |
| Slash pine              | 46              | 11                   | 27           | 29              | 18                 | 41              |
| Redwood                 | 46              | 7                    | 33           | 35              | 22                 | 50              |
| Second growth           |                 |                      |              |                 |                    |                 |
| Northern white<br>cedar | 44              | 14                   | 30           | 32              | 20                 | 45              |
| Western Hemlock         | 42              | 9                    | 29           | 31              | 19                 | 44              |

\* For calculation of carbon yield, an average value of 50 wt% carbon in lignocellulose is taken,<sup>13</sup> and carbon loss during the HDO is also taken into account (according to equation 2). The presented value is for *fuel* production; for the chemical pathway, the value is lower by ~1%; † defined as 'process thermal efficiency' (PTE). 20 MJ kg<sup>-1</sup>, an approximate average value is taken as the high heat value (HHV) for all varieties of biomass in this calculation, referring to<sup>18</sup>. The HHV values for biomass-to-ethanol and fuels obtained in our process are 30 and 45 MJ kg<sup>-1</sup> (referring to *Fischer-Tropsch* diesel), respectively.<sup>15</sup>

## References

1. Scanlon, J.T., and Willis, D.E. (1985). Calculation of flame ionization detector relative response factors using the effective carbon number concept. *J Chromatogr Sci* 23, 333-340.
2. Wu, C., Wang, Z., Huang, J., and Williams, P.T. (2013). Pyrolysis/gasification of cellulose, hemicellulose and lignin for hydrogen production in the presence of various nickel-based catalysts. *Fuel* 106, 697-706.
3. Couhert, C., Commandre, J.-M., and Salvador, S. (2009). Is it possible to predict gas yields of any biomass after rapid pyrolysis at high temperature from its composition in cellulose, hemicellulose and lignin? *Fuel* 88, 408-417.
4. Zhao, M., Florin, N.H., and Harris, A.T. (2009). The influence of supported Ni catalysts on the product gas distribution and H<sub>2</sub> yield during cellulose pyrolysis. *Appl Catal B: Environ* 92, 185-193.
5. Taylor, A.D., DiLeo, G.J., and Sun, K. (2009). Hydrogen production and performance of nickel based catalysts synthesized using supercritical fluids for the gasification of biomass. *Appl Catal B: Environ* 93, 126-133.
6. Inaba, M., Murata, K., Saito, M., and Takahara, I. (2006). Hydrogen production by gasification of cellulose over Ni catalysts supported on zeolites. *Energy Fuels* 20, 432-438.
7. Asadullah, M., Ito, S.I., Kunimori, K., Yamada, M., and Tomishige, K. (2002). Biomass gasification to hydrogen and syngas at low temperature: Novel catalytic system using fluidized-bed reactor. *J Catal* 208, 255-259.
8. Levin, D.B., Islam, R., Cicek, N., and Sparling, R. (2006). Hydrogen production by *Clostridium thermocellum* 27405 from cellulosic biomass substrates. *Int J Hydrogen Energ* 31, 1496-1503.
9. Li, S., Lu, Y., Guo, L., and Zhang, X. (2011). Hydrogen production by biomass gasification in supercritical water with bimetallic Ni-M/ $\gamma$ -Al<sub>2</sub>O<sub>3</sub> catalysts (M = Cu, Co and Sn). *Inter J Hydrogen Energ* 36, 14391-14400.
10. Kimura, T., Miyazawa, T., Nishikawa, J., Kado, S., Okumura, K., Miyao, T., Naito, S., Kunimori, K., and Tomishige, K. (2006). Development of Ni catalysts for tar removal by steam gasification of biomass. *Appl Catal B: Environ* 68, 160-170.
11. Corella, J., Aznar, M.P., Caballero, M.A., Molina, G., and Toledo, J.M. (2008). 140 g H<sub>2</sub>/kg biomass d.a.f. by a CO-shift reactor downstream from a FB biomass gasifier and a catalytic steam reformer. *Inter J Hydrogen Energ* 33, 1820-1826.
12. Wu, C., Wang, L., Williams, P.T., Shi, J., and Huang, J. (2011). Hydrogen production from biomass gasification with Ni/MCM-41 catalysts: Influence of Ni content. *Appl Catal B: Environ* 108-109, 6-13.
13. Pettersen, R.C. (1984). The chemical composition of wood. *The chemistry of solid wood* 207, 57-126.

14. Kim, M., and Day, D.F. (2011). Composition of sugar cane, energy cane, and sweet sorghum suitable for ethanol production at Louisiana sugar mills. *J Ind Microbiol Biotechnol* 38, 803-807.
15. Argonne National Laboratory (2010). Lower and Higher Heating Values of Gas, Liquid and Solid Fuels. Lower and Higher Heating Values of Gas, Liquid and Solid Fuels.
16. Harris, J.F., Baker, A.J., Conner, A.H., Jeffries, T.W., Minor, J.L., Pettersen, R.C., Scott, R.W., Springer, E.L., Wegner, T.H., and Zerbe, J.I. (1985). Two-stage, dilute sulfuric acid hydrolysis of wood: an investigation of fundamentals.
17. Rinaldi, R., and Schuth, F. (2009). Design of solid catalysts for the conversion of biomass. *Energy Environ Sci* 2, 610-626.
18. Demirel, Y. (2012). Energy Energy Types. 27-70.
